# Let Me Make You Happy, And I'll Tell You How you look around: Using an Approach-Avoidance Task as an Embodied Mood Prime in a Free-Viewing Task

Artur Czeszumski<sup>1,✉</sup>, Friederike Albers<sup>1</sup>, Sven Walter<sup>1</sup>, and Peter König<sup>1,2</sup>

<sup>1</sup>Institute of Cognitive Science, Universität Osnabrück, Osnabrück, Germany

<sup>2</sup>Institut für Neuropsychologie und Pathophysiologie, Universitätsklinikum Hamburg-Eppendorf, Hamburg, Germany

The embodied approach of human cognition suggests that concepts are deeply dependent upon and constrained by an agent's physical body's characteristics, such as performed body movements. In this study, we attempted to broaden previous research on emotional priming investigating the interaction of emotions and visual exploration. We used the joystick-based approach-avoidance task to influence the emotional states of participants, and subsequently, we presented pictures of news web pages on a computer screen and measured participant's eye movements. As a result, the number of fixations on images increased, the total dwell time increased, and the average saccade length from outside of the images towards the images decreased after the bodily congruent priming phase. The combination of these effects suggests increased attention to web pages' image content after the participants performed bodily congruent actions in the priming phase. Thus, congruent bodily interaction with images in the priming phase fosters visual interaction in the subsequent exploration phase.

Approach Avoidance Task | Embodiment | Automatic Approach Bias | Cognitive Bias Modification | Emotions | Eye-tracking | Mood | Overt Attention  
Correspondence: [aczeszumski@uos.de](mailto:aczeszumski@uos.de)

## Introduction

Gaze-dependent shifts play a pivotal role in visual processing. Using modern eye-tracking techniques, it is possible to measure overt shifts of attention reliably and unobtrusively, helping us to understand eye movement behavior. What one observes is influenced by at least three factors. First, attention is influenced by properties of the external stimuli, processed in a bottom-up hierarchy (1, 2). This includes low-level features of the visual stimulus, for instance, contrast contours, color, texture, and motion. However, it may also include more complex features like textures, complex shapes of objects, or the emotional valence of images (3, 4). Second, attention is influenced by internal variables like task-demands (5–7), as well as the emotional state of the observer (8). Third, the spatial factors like the central bias (9) and saccadic momentum (10) influence the selection of fixation targets. The relative contribution of these three factors is a matter of debate (11), and presumably depends on the precise circumstances (5).

When it comes to the role of emotional states or moods af-

fecting attention it is useful to distinguish between an internal affective influence, e.g., the mood state of the observer, and an external affective influence, e.g., the stimulus valence (8, 12, 13). A situation in which attention is subject to both external and internal affective influences is when one explores web pages of online news portals. On the one hand, such web pages commonly contain positive alongside negative information, where as, on the other hand, one is in a specific mood: Positive, negative, or neutral. (13) used such an environment to investigate the internal and external affective influences in a free-viewing task performed by young adults. The participants' mood was primed by a series of either positively or negatively valenced visual stimuli. Subsequently, they had to explore web pages containing both positively and negatively valenced content. An analysis of the eye-tracking data revealed that a negative mood state marginally elicited a more spatially extensive exploration, and that attention for negative news increased in participants who were in a positive mood state. Thus, the state of the observer as well as the external affective influence impacted the visual exploration.

The valence of the stimulus influences responses beyond visual exploration. Specifically, approach-behavior is naturally associated with an appraisal of something as 'good.' In contrast, avoidance behavior is naturally associated with an appraisal of something as 'bad.' As a consequence, we are faster (14) and more accurate (15) when making movements that correspond to their embodied meaning, i.e. approach for good, and avoid for bad. In particular, there is a general bodily tendency to approach positive and avoid negative cues and to do so faster than vice versa (16). This gives evidence for a general bodily reaction to positive or negative stimuli (16, 17). For example, spider phobics avoid pictures of spiders more strongly than neutral cues (18); socially anxious people avoid smiling and angry faces faster than controls (19); schizophrenic patients with higher levels of oxytocin avoid angry faces faster than controls (20); individuals with anorexia-nervosa exhibit a decreased approach bias for food cues (21); and healthy adults pull positive words faster towards them while pushing negative words faster away (14). Thus, the valence of stimuli has a general impact on bodily state and actions.

The cognitive mechanisms of the automatic approach bias are still debated. One approach, the concept of embodied cognition, rejects the idea that an agent's cognitive life can be understood without taking into account the particular morphological, biological, and physiological characteristics of its body (22–24). For instance, language processing (25), memory (15), visual-motor recalibration (26), or distance estimation (27) all rely on specific body characteristics. Moreover, even our abstract concepts are bodily 'grounded' and arise from the body (28). That is to say that according to the embodied approach of cognition and affectivity, cognitive and affective phenomena can be fully understood only by taking into account the specific morphological, biological, and physiological details of the agent's body (22–24). In particular, bodily movements are specific to the kind of body we have and to the environment we interact with and are thus naturally meaningful. Similarly, the embodied approach to cognition tries to explain the approach-avoidance behavior (29).

However, although emotional priming has been an important topic in research on top-down influences in overt attention, in particular when it comes to disentangling external and internal affective influences, there is little research using embodied primes (30). Our onto- and phylogeny as creatures with a specific bodily morphology make it natural that pulling something towards us is positively valenced while pushing it away is negatively valenced (29). Since the human abdominal region is extremely vulnerable, we have to protect it by allowing only trustworthy objects to come close to it. Since survival requires energy, we have to pull nourishing objects towards us while avoiding rotten, poisonous, unsanitary, or noxious objects. While strangers must typically be kept at bay, procreation, nurturing infants, and giving them love and comfort require social approaching. The idea that approach- and avoidance-behavior is naturally associated with appraisals of something as 'good' or 'bad' is also in line with embodied accounts of emotions (31, 32), in particular with Damasio's (33) 'somatic marker' theory, according to which emotions function to direct animals towards what is good and direct them away from what is bad. Hence, these considerations suggest that approaching something or pulling it towards us is naturally meaningful, indicating that something is positive.

If the automatic approach bias is indeed a general bodily reaction to positive or negative stimuli (16), we should observe it in healthy adults performing an approach-avoidance task. This type of explanation raises new questions. If the bodily relation is indeed crucial, we would expect not only an influence of the stimulus valence but also a congruency effect. Body movements that are in line with our preferences (pull towards positive, "good"/push away negative, "bad") should influence our eye movements differently than priming by incongruent actions preferences (pull towards negative, "bad"/push away positive, "good"). That is, here we are primarily interested in modulating the natural (embodied) action in response to a stimulus e.g. congruent vs. incongruent, as well as investigating the effects on subsequent visual ex-

ploratory behavior.

The present study builds on an embodied approach to the automatic approach bias in order to investigate (1) whether healthy adults exhibit a comparable automatic approach bias concerning positively and negatively valenced stimuli and (2) how a positive vs. negative mood, induced by a congruent vs. incongruent approach-avoidance task, affects their overt attention in a free-viewing task.

## Methods

### Participants

Twenty participants (6 male, 18 right-handed, mean age of 22.6 years, standard deviation of 2 years) took part in the experiment. They gave written informed consent before the start of the experiment. Participants received either 9 € or course credits in exchange for their participation. All participants had normal or corrected to normal vision and were not aware of the scientific purpose of the study. They were either native German speakers or fluent in the German language. This was important since the presented stimuli included headlines written in German. The ethics committee of Osnabrück University approved the study.

### General Apparatus

We presented all stimuli on a 24" LCD monitor (BenQ XL2420T; BenQ, Taipei, Taiwan) with a refresh rate of 114 Hz. Participants sat 80 cm away from the screen. The experiment was controlled by a PC (Dell) that was connected to an eye tracker computer via an Ethernet cable. We used a head-mounted eye tracker (Eye Link II system) from SR-Research Ltd. (SR-Research Ltd, Ontario, Canada) to track the participants' eye movements. The eye tracker in turn was connected to a DOS-based computer (Pentium 4; Dell, Round Rock, TX, USA) running the application software. In total, the eye tracker comprised three infrared cameras. The head camera recorded infrared sensors attached to the corners of the monitor to continuously calculate the head position in relation to the screen. This allowed a stable gaze recording irrespective of involuntary small head movements. The other two infrared cameras recorded the participants' pupil positions. The sampling rate of binocular recordings was 500 Hz. The room was darkened during the entire experiment.

A 13-point calibration task preceded each recording. It consisted of fixation points appearing consecutively in random order at various screen locations, and participants were instructed to focus their gaze at these points. Each point had a visual angle size of 0.5°. We validated the calibration by calculating the drift error for each point. Thereby it was assured that the mean validation error stayed below a 0.3° visual angle and the maximum validation error below a 1° visual angle. The calibration was repeated until the mentioned accuracy was reached.

We used the eye tracker's default settings to calculate saccades and fixations. Saccade detection was based on a velocity of at least 30° visual angle/s and an acceleration of at least 8000° visual angle/s<sup>2</sup>. To trigger a saccade, the saccade signal had to be sustained for at least 4 ms. By the time

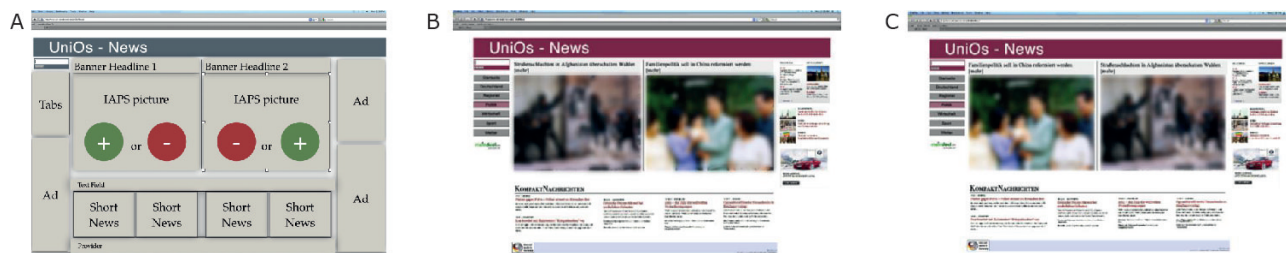

**Fig. 1.** Web pages used in the study. (A) Prototype web page with different sections: headlines, adds, tabs, news, and images. (B) Example of a web page with a negative image on the left side. (C) Example of a web page with a negative image on the right side (reverse of (B)).

the eyes moved significantly from the fixation point (i.e., exceeding a motion threshold), the temporal and spatial onset of the saccade had been defined. By default, we set this motion threshold to a  $0.1^\circ$  visual degree. After the saccade onset, the minimal saccade velocity was  $25^\circ$  visual degree/s. Following this, a period without a saccade was marked as fixation. To control for drifts in measurements, each trial was followed by a fixation cross appearing in the center of the screen. The first fixation following the onset of each stimulus was excluded from our analysis because this was an artifact from the drift correction before the onset of the respective trial.

The joystick used for the approach-avoidance task (Logitech Attack TM 3; Logitech, Apples, Switzerland) was connected to the computer screen. Matlab's Psychtoolbox V3 (r2017a; MathWorks Company) enabled us to record response times (pushing/pulling movements). The joystick was placed on the table in front of the participants. We used MATLAB to preprocess eye-tracking data and R to analyze all data. Analysis scripts and data are available online (<https://osf.io/cyz9b/>).

## Stimuli

The experiment included two separate phases (see below for details). First, participants performed an approach-avoidance task viewing isolated images. Afterwards, participants visually explored web pages, each containing two embedded images with additional text columns in a typical newspaper layout. As we investigated the influence of the approach-avoidance task on later visual exploration, we labeled the isolated images as "primes".

In this study we used 88 full-colored images from the International Affective Picture Set (IAPS) (34). (13) used the identical stimulus set. Half of the images had a valence rated below 3 (IAPS scale) and served as negative primes. The other 44 images had valence ratings above 7 and served as positive primes. To prevent the images from blurring, we presented all of them in their native resolution of  $1024 \times 768$  pixels on a gray background (RGB values: 182/182/182), centered in the middle of the screen (resolution of  $1920 \times 1080$  pixels, Figure 2A).

In the present study, twenty-four prototypes of news web pages were used, previously designed by (13) (Figure 1). The web page images' resolution fit the screens' resolution ( $1920 \times 1080$ ). Two target areas, embedded by several textual and pictorial components, were constructed in one web page de-

sign (Figure 1A). Each main news article included either a negative or positive IAPS image ( $615 \times 411$  pixels), a matching heading, as well as a link to the entire news report. It is important to note that there was no further textual content regarding the main news. This was done to avoid attraction biases because of how appealing news may have been for individuals who participated. Since participants did not interact with the web pages, the link served no function, except for creating a realistic version of a news web page that can be found on the world wide web. The structure and content of the web pages remained the same throughout the whole study. However, the side of the negative and positive content was counterbalanced (Figure 1B, C). The set of 48 images, embedded in the 24 web pages, differed from those used in the priming sessions.

The additional elements on each web page were four short news reports about ongoing current affairs. These elements were placed below the main news articles. The frame around the main news articles was completed by flanking advertisements on the left and right sides (Figure 1A). As a standard feature on regular web pages, the upper left corner was secured for a tabs region which is necessary for general navigation. Previous work by (13), using the same set of web pages, tested for the possibility that differences in eye movement parameters, within positive and negative images, could evolve from systematic differences in visual saliency. Therefore, a standard algorithm by (35) that extracts the physical features of images and, based on this, predicts fixation patterns, was applied. In addition to this, a graph-based visual saliency (GBVS) developed by (36) was applied, as it predicts the fixations with a higher probability. After application, no difference regarding the visual saliency was found between the positive and negative images in the stimulus set (both  $t(35) \leq 0.941$ ,  $p \geq 0.356$ ).

## Procedure and Design

We divided the participants randomly into two groups. One group started with the congruent block of the approach-avoidance task. The other group started with the incongruent block. In each condition, participants faced a random sequence of 44 images of different valence (22 positive, and 22 negative images). As soon as an image was presented, the participants had to make the appropriate response with the joystick. The task paradigm required participants to push or pull the joystick in response to the valence of the image. Par-



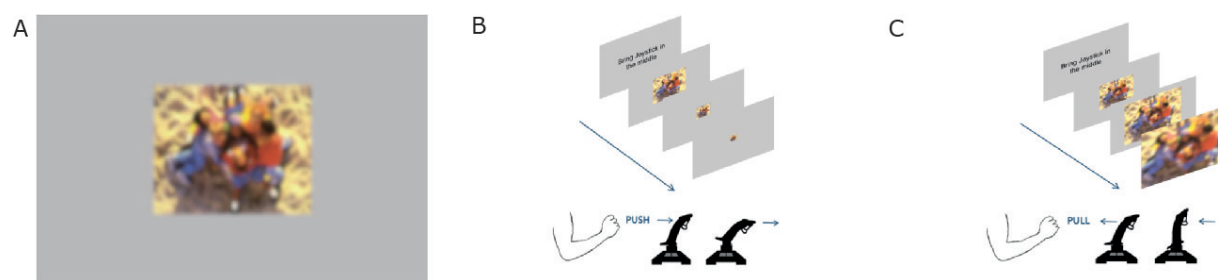

**Fig. 2.** Embodied primes used in the study. (A) Example of one priming stimulus: IAPS image with surrounding gray frame. This photograph depicts positive content with children laughing and playing on a sandy playground. Hint: Due to restrictions of showing IAPS images in public, it is masked with a diffusing filter. (B) Incongruent condition: joystick pushed forward - positive prime zooms out. (C) Congruent condition: joystick pulled backward - positive prime zooms in.

Participants used their dominant hand to manipulate the joystick in front of them. Participants in the congruent task condition had to pull (approach) the joystick towards themselves whenever a positive image was shown, and push (avoid) the joystick whenever a negative image was shown. In the incongruent condition, participants had to act reversely. They had to pull the negative images towards themselves and push away the positive ones (Figure 2B, C). They were instructed to respond as quickly and as accurately as possible. It was not possible to rectify and correct response mistakes. Additionally, while moving the joystick towards or away, the image changed in size. The zoom feature of the approach-avoidance task was programmed in MATLAB's Psychtoolbox V3 (r2017a; MathWorks Company); as such, a shown image smoothly decreased in size as soon as the joystick was pushed (Figure 2B). Conversely, the image size increased once the joystick was pulled (Figure 2C). It is important to note that participants were instructed to push or pull the joystick to its limit. Overall, participants took about 5 minutes to complete this first part of the experiment.

In the subsequent eye-tracking session, we recorded the viewing behavior on prototypes of 12 news web pages was recorded. Following earlier research of (13) and ensuring the same experimental design, each web page was displayed for 15 seconds. We instructed participants to explore the web pages freely (free-viewing task).

After the eye-tracking session, participants had a short break. The second part of the experiment, directly after the break, required the participants to complete the joystick approach-avoidance task in the other conditions to before. Participants who performed in the congruent approach-avoidance task, had to complete the incongruent condition. The opposite applied to participants in the other group. After the second priming session, an additional 12 web pages were displayed following the same procedure as described above (free-viewing task).

## Results

### Performance in the embodied approach-avoidance task

For the priming part of the experiment, we first calculated the accuracy of performance to check whether participants followed instructions. In the congruent condition, they had to pull positive and push negative primes. In the incongruent

condition, the assigned actions were reversed. We found that participants made a low amount of errors (3.6%). This suggests that instructions were clear, and participants followed them. Therefore, we excluded error trials from any further analysis.

Second, we focused on reaction time in the priming part of the experiment to check whether positive and negative images in congruent and incongruent conditions involve different cognitive processes and, therefore, longer/shorter reaction times. As the data showed a skewed distribution, we log-transformed it before further analysis (we used natural logarithm). We used a linear mixed model (LMM) to analyze response times. The LMM was calculated with the lme4 package (37), and *p*-values were based on Wald's T-test using the lmerTest package (38). Degrees of freedoms were calculated using the Satterthwaite approximation. We modeled response times by image valence (positive and negative), and experimental condition (congruent and incongruent movements) as fixed effects and interactions between them. As random effects, we used random intercepts for grouping variable participants. For all predictors, we used an effect coding scheme with binary factors coded as -0.5 and 0.5. Thus, the resulting estimates can be directly interpreted as the main effects. The advantage of this coding scheme is that the fixed effect intercept is estimated as the grand average across all conditions and not a baseline condition average. We found the main effect of the image valence ( $t(1673.02) = -3.726, p < .001$ ) on reaction times (Figure 3B). The natural logarithm of the response time in the incongruent condition was about 0.049 times smaller than in the congruent condition. This corresponds to a speedup (reduction of reaction time) by a factor of 5.03%. Furthermore, we found the main effect of the congruency of the task ( $t(1673.04) = -4.71, p .001$ ) (Figure 3B). The reaction to negative stimuli was slower by about 6.39%. The interaction between these effects was not significant ( $t(1673.02) = -0.87, p > .38$ ). These results demonstrate independent additive effects of faster movements under congruent conditions and faster movements in response to negative pictures.

### Eye movements in the free-viewing task (web pages)

As a next step, we investigated the effect of priming (condition: congruent and incongruent) on the viewing of news pages containing emotional stimuli (valence: negative and positive) on either side (side: left and right). The participants

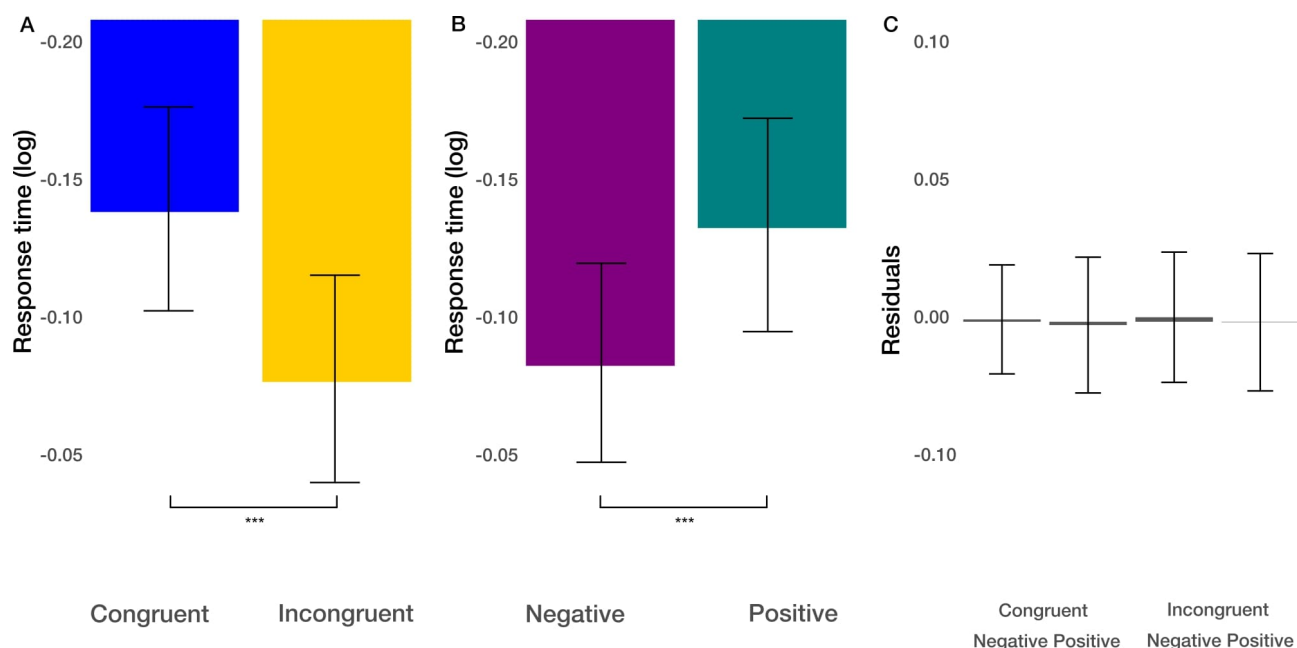

**Fig. 3.** Response time results. (A) The main effect of congruency of movements. (B) The main effect of image valence (positive vs. negative). (C) Averaged residuals of all condition combinations from reaction time linear mixed model. In all plots, bars represent mean values and whiskers standard error of the mean.

freely viewed different web pages containing one positive image and one negative image and additional filler texts, while we collected eye movement data. We characterized the exploration of these web pages with the two images as regions of interest (ROIs) with a variety of different eye movement measures. Specifically, we used four different measures to quantify eye movements within ROIs: the average fixation duration within each image; the number of fixations within each image; the total dwell time on each image; and the length of saccades within each image. Additionally, we analyzed the number of saccades and their length from the outside to the inside of the images. For all six measures, we used the same statistical procedures. Similarly, to the response time analysis, we employed linear mixed models. We modeled each of the variables by experimental condition (congruent and incongruent movements before the free-viewing task), image valence (positive and negative), and side of the image (left and right) as fixed effects as well as the interactions between them as random effects. We used random intercepts for grouping variable participants. For all predictors, we used an effect coding scheme with binary factors coded as -0.5 and 0.5. We visually inspected the normality of the data. All variables, aside from dwell time, were log-transformed to achieve normally distributed data. Jointly, these measures and analyses allow characterization of viewing behavior on the web pages after priming.

#### Fixation duration within ROIs

As the first measure, we used the average fixation duration within each ROI as a measure of the depth of processing (39). We did not find an effect of condition ( $t(8291.27) = -0.615$ ,  $p = .54$ ) on fixation duration. However, we found the main effect of the valence ( $t(8286.74) = -3.513$ ,  $p < .001$ ) (Figure 4A). The average fixation duration on negative images was

longer by about 2.8%. Furthermore, we observed a main effect of the side ( $t(8284.26) = -3.093$ ,  $p < .01$ ) (Figure 4B). Fixations on the image displayed on the left side were longer by about 2.45%. Further, we found a significant interaction between valence and side ( $t(8283.33) = -3.318$ ,  $p < .001$ ) (Figure 4C). The difference in fixation duration on positive and negative images was larger on the right side. The size of this interaction was of the same order of magnitude as the main effect of the side of the image. That is, the longest average fixation duration was observed for the combination of negative images on the right side of the displayed web page. All other two-way and three-way interactions were not significant ( $p > .18$ ). These results show that the parameters of the displayed web page, i.e. valence and side, had a significant influence on the depth of processing at individual fixation locations. However, this did not apply to the priming condition.

#### Number of fixations within ROIs

Next, we considered the number of fixations within each image as a measure of attention devoted to the respective stimulus. We found the main effect of condition ( $t(915.2) = -2.271$ ,  $p = .0234$ ) (Figure 5A). The number of fixations within the ROIs after congruent priming was larger by 11.47%. Furthermore, we observed the main effect of the valence ( $t(915.19) = -5.112$ ,  $p < .001$ ) (Figure 5B). Negative images captured 27.68% more fixations than positive images. Finally, we found the main effect of the side ( $t(915.17) = -2.816$ ,  $p < .01$ ) (Figure 5C). Images displayed on the left side captured 14.41% more fixations. All two-way and three-way interactions were not significant ( $p > .1$ ). These results demonstrate additive effects, in terms of the logarithm of the number of fixations. Converted back to the number of fixations within the ROIs, this results in multiplicative effects on the condi-

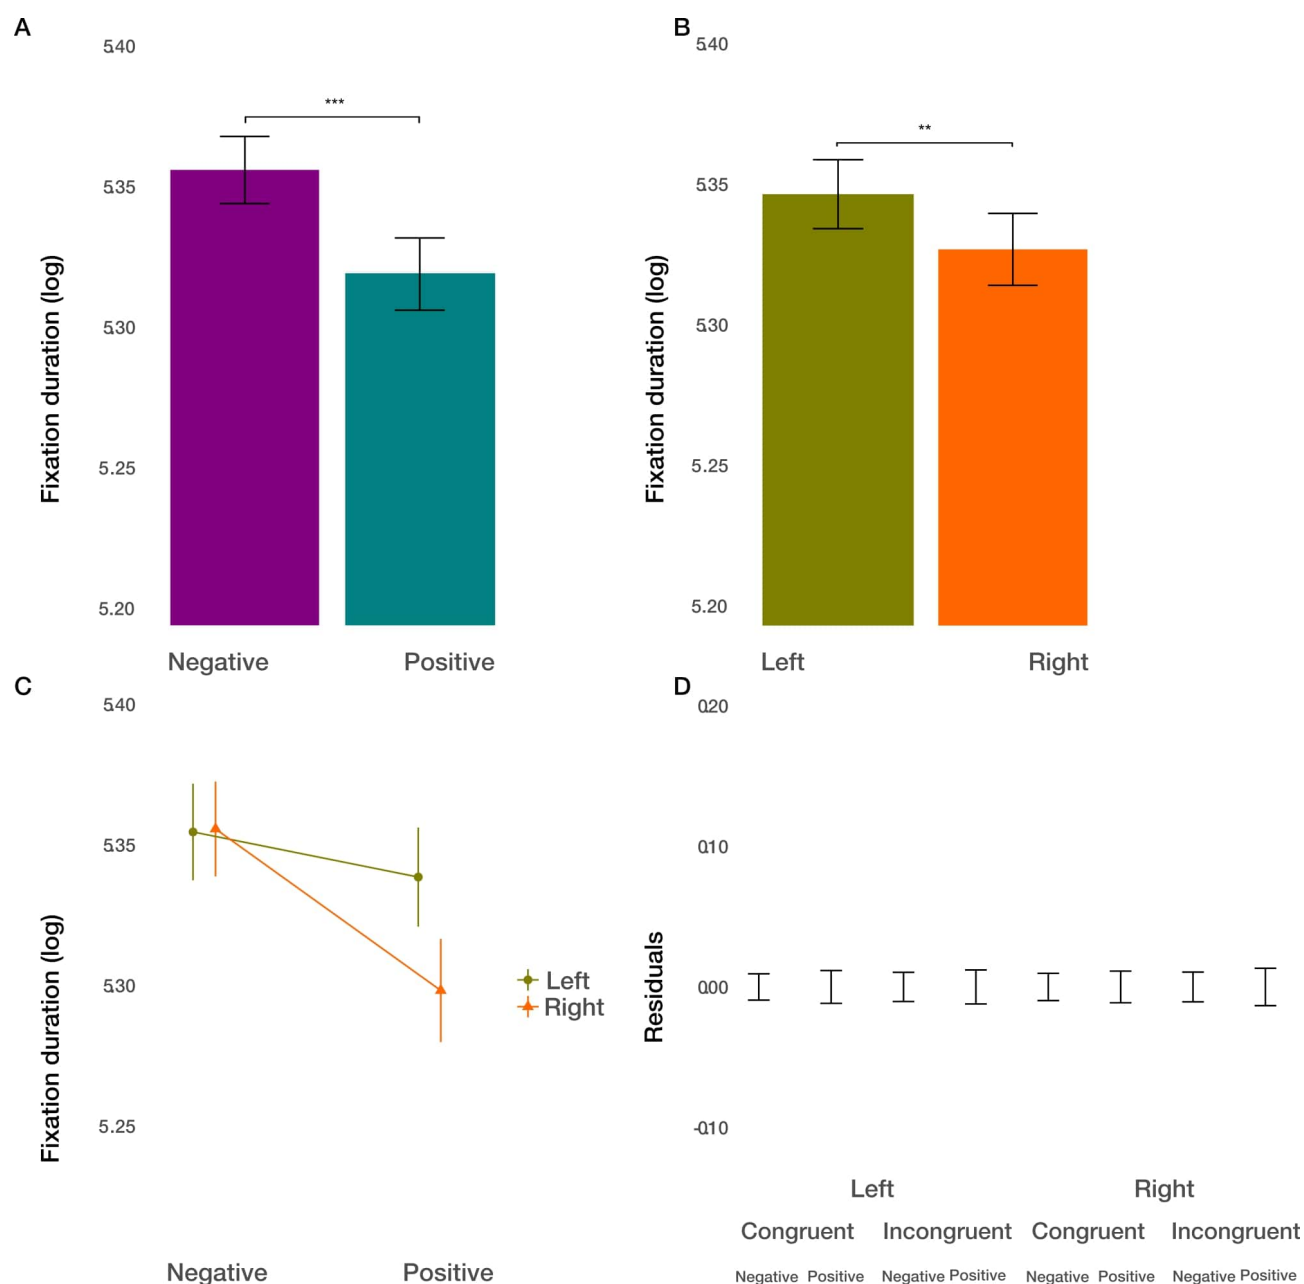

**Fig. 4.** Fixation duration results. (A) The main effect of image valence (positive vs. negative). (B) The main effect of the side (left vs. right). (C) Interaction between valence and side. (D) Averaged residuals of all condition combinations from reaction time linear mixed model. In all plots, bars represent mean values and whiskers standard error of the mean.

tion, valence, and side on the attention devoted to the images.

### Dwell time within ROIs

The dwell time combines the aspects of fixation duration and the number of fixations within the ROIs. We found the main effect of the main effect of condition ( $t(915.2) = -2.274$ ,  $p = .0232$ ) (Figure 6A). The dwell time within the ROIs after congruent priming was on average 190 ms larger. Furthermore, we observed the main effect of the valence ( $t(915.2) = -6.146$ ,  $p < .001$ ) (Figure 6B). Dwell time on negative images was on average 513 ms larger than on positive images. Finally, we observed the main effect of the side ( $t(915.17) = -3.381$ ,  $p < .01$ ) (Figure 6C). On average, dwell time within

images was on average 282 ms larger on the left side. All two-way and three-way interactions were not significant ( $p > .33$ ). These results resemble the results in the analysis of the number of fixations within ROIs. They provide evidence for independent effects of the priming condition, the valence of the viewed image, and the side of image location on the dwell time.

### Saccade's length within ROIs

As a measure of exploration within the images, we used the saccadic length. We did not find the main effect of condition on the saccadic length ( $t(8296.9) = 1.321$ ,  $p = .187$ ). However, we did find the main effect of the image

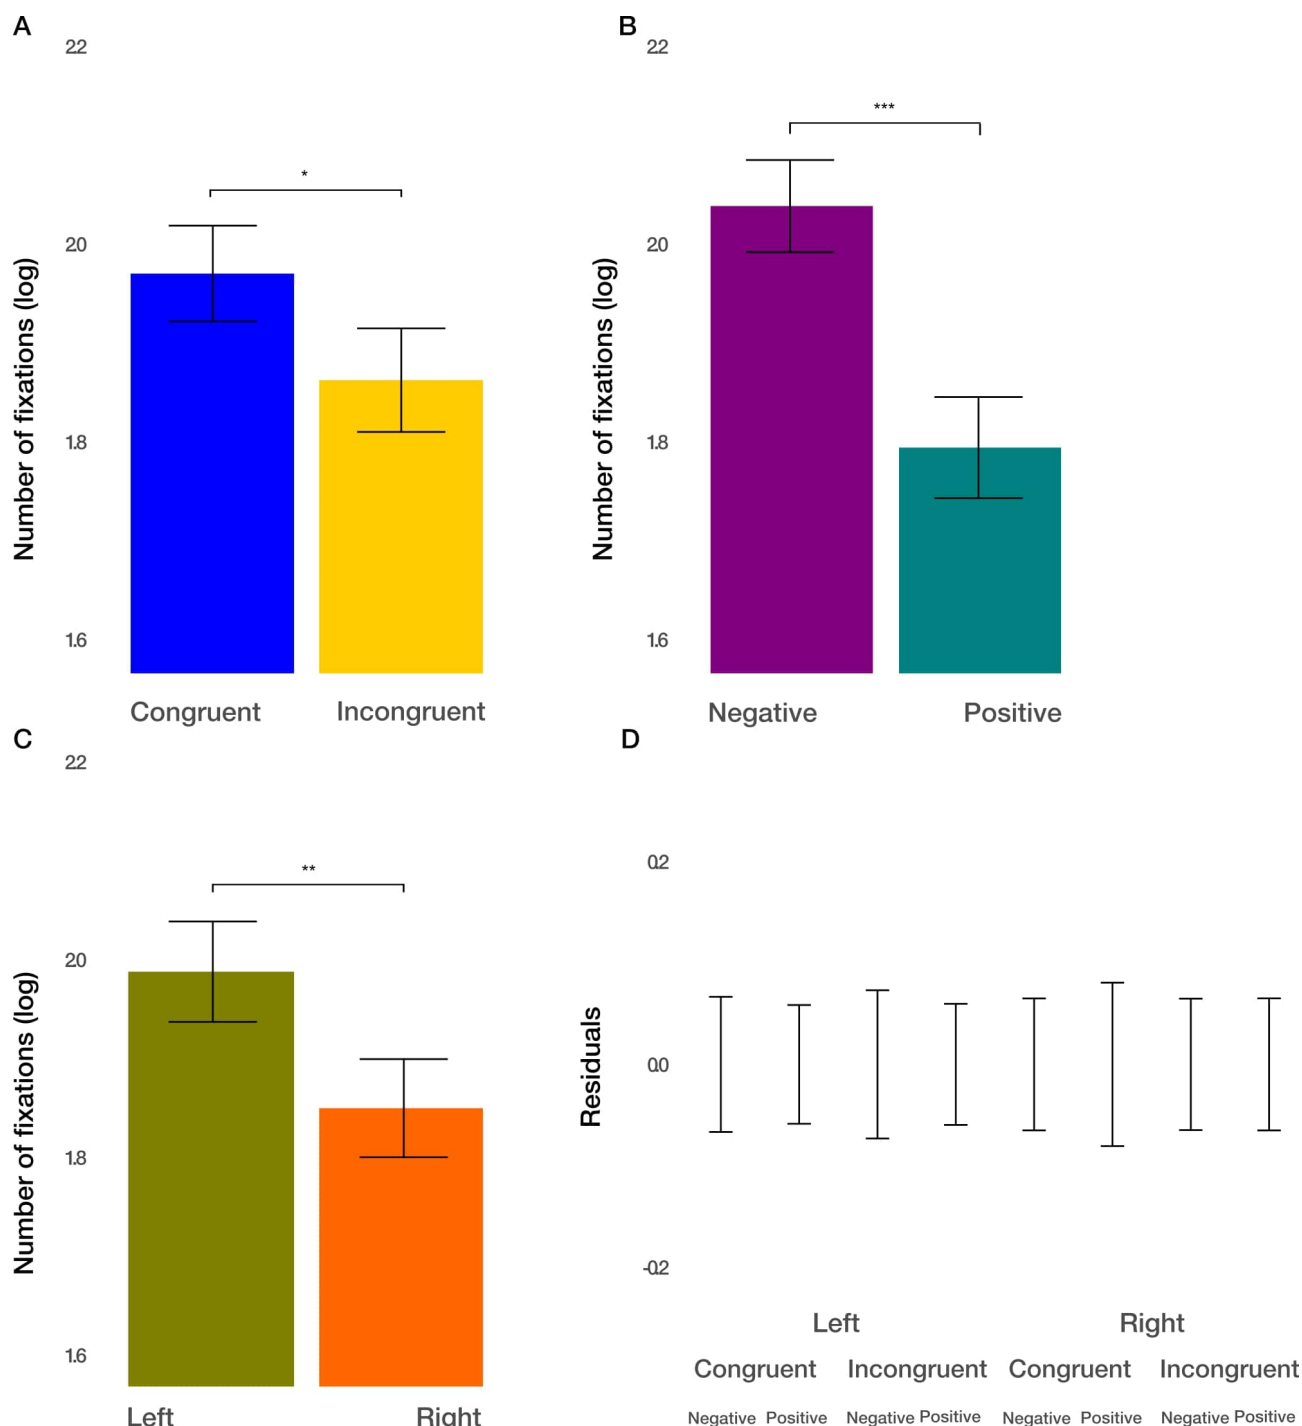

**Fig. 5.** The number of fixations results. (A) The main effect of image congruency. (B) The main effect of valence (left vs. right). (C) The main effect of the side (left vs. right). (D) Averaged residuals of all condition combinations from reaction time linear mixed model. In all plots, bars represent mean values and whiskers standard error of the mean.

valence ( $t(8291.31) = 4.253, p < .001$ ) (Figure 7A). Within negative images, saccades were shorter by 9.55%. Further, we observed a small but significant main effect of the side ( $t(8287.02) = 2.618, p < .01$ ) (Figure 7B) on the saccade's length. Saccades were shorter by 5.76% on the left side. Furthermore, we found significant two-way interactions between the image valence and the side of the image ( $t(8285.35) = -2.038, p = .0415$ ) (Figure 7C), with a slightly larger difference in saccadic length for positive and negative images on the left

side. Additionally, we observed an interaction of condition and side ( $t(8289.3) = 2.907, p < .01$ ) (Figure 7D). Whereas images displayed on the left condition were trivial, images on the right side were explored by longer saccades after incongruent priming. We did not find an interaction between condition and valence ( $p > .96$ ), as well as no three-way interaction between all factors ( $p > .27$ ). These results give evidence for a more focused exploration of images with negative valence, specifically when displayed on the left side.

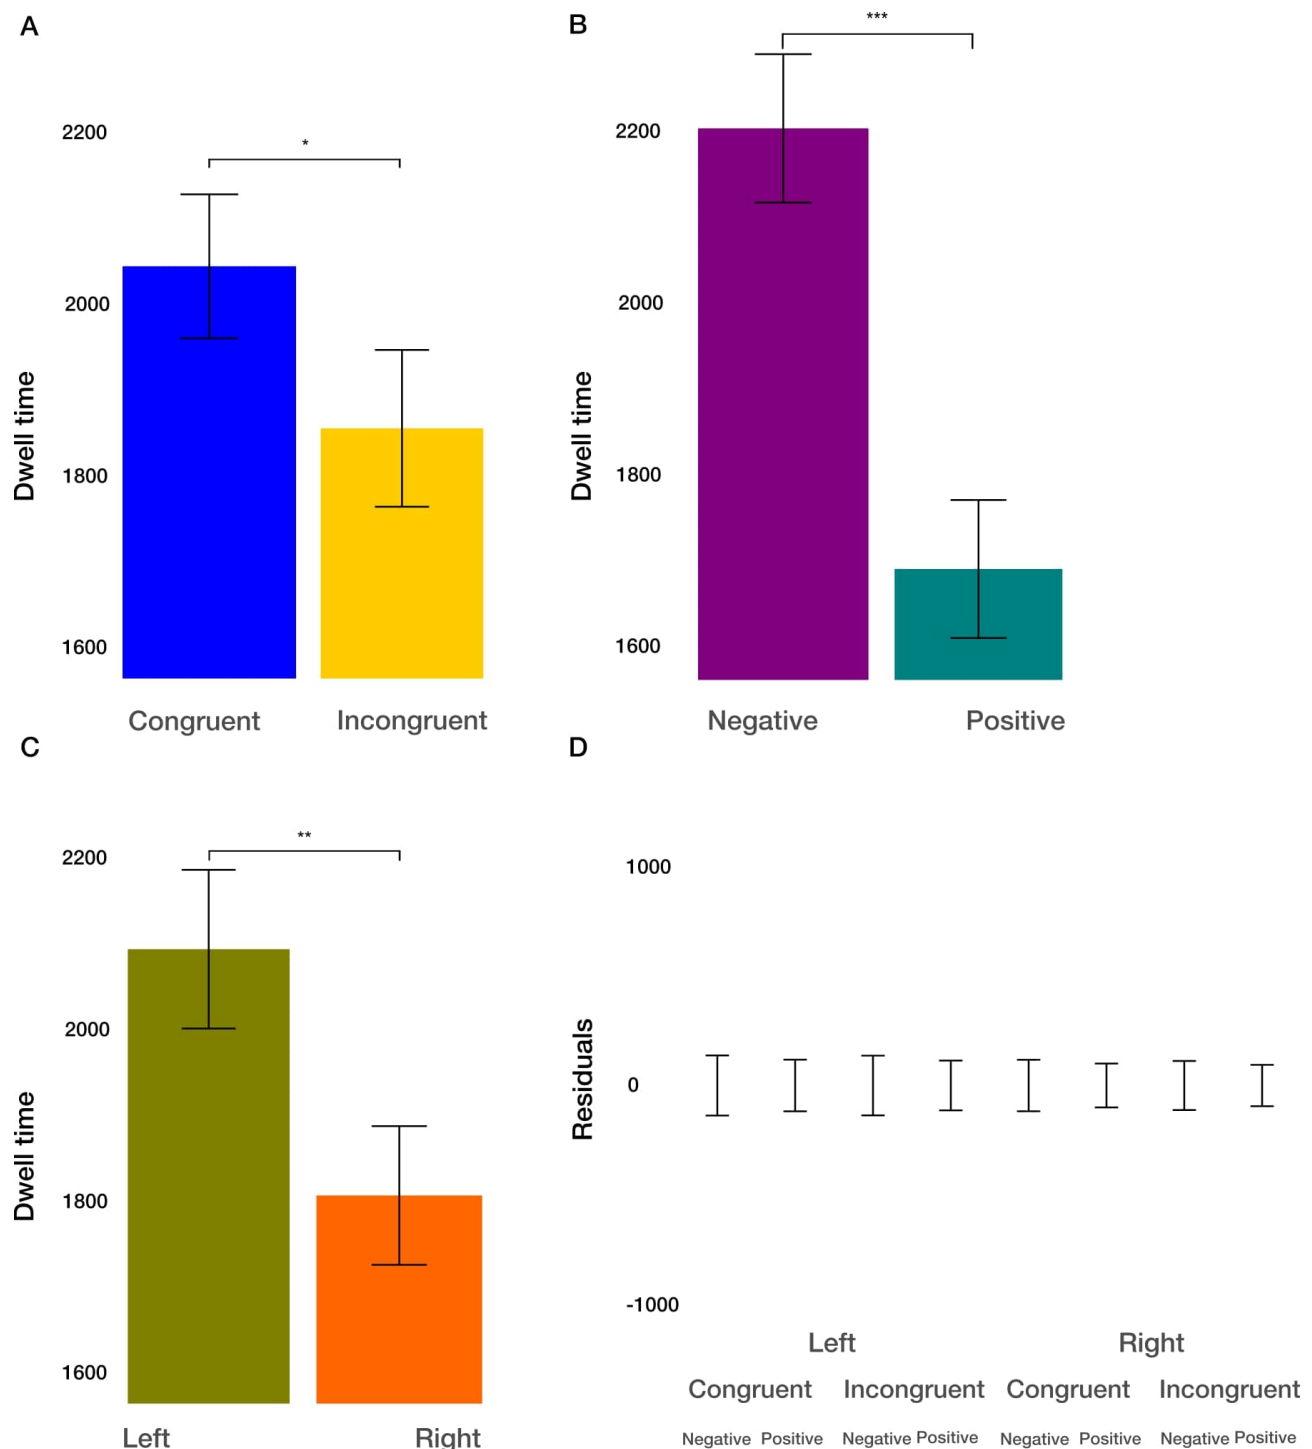

**Fig. 6.** Dwell time results. (A) The main effect of image congruency. (B) The main effect of image valence (positive vs. negative). (C) The main effect of the side (left vs. right). (D) Averaged residuals of all condition combinations from reaction time linear mixed model. In all plots, bars represent mean values and whiskers standard error of the mean.

The priming condition modulated the influence of the side with a larger differential effect on the exploration of images displayed on the right side.

#### **Number and length of saccades from outside ROIs towards ROIs**

As a measure of how well the images can attract attention, we utilized the number of saccades from outside the image

towards the inside. We found a trend towards significance for the main effect of the congruency of the image ( $t(850.76) = -1.894, p = .0586$ ). Participants on average made 6.96% more saccades from outside into an image after congruent condition. The main effect of the valence of the image ( $t(851.31) = -1.936, p = .0532$ ) on the number of saccades from outside images towards them missed the significance threshold. Nominally, participants made 7.13% more saccades on neg-



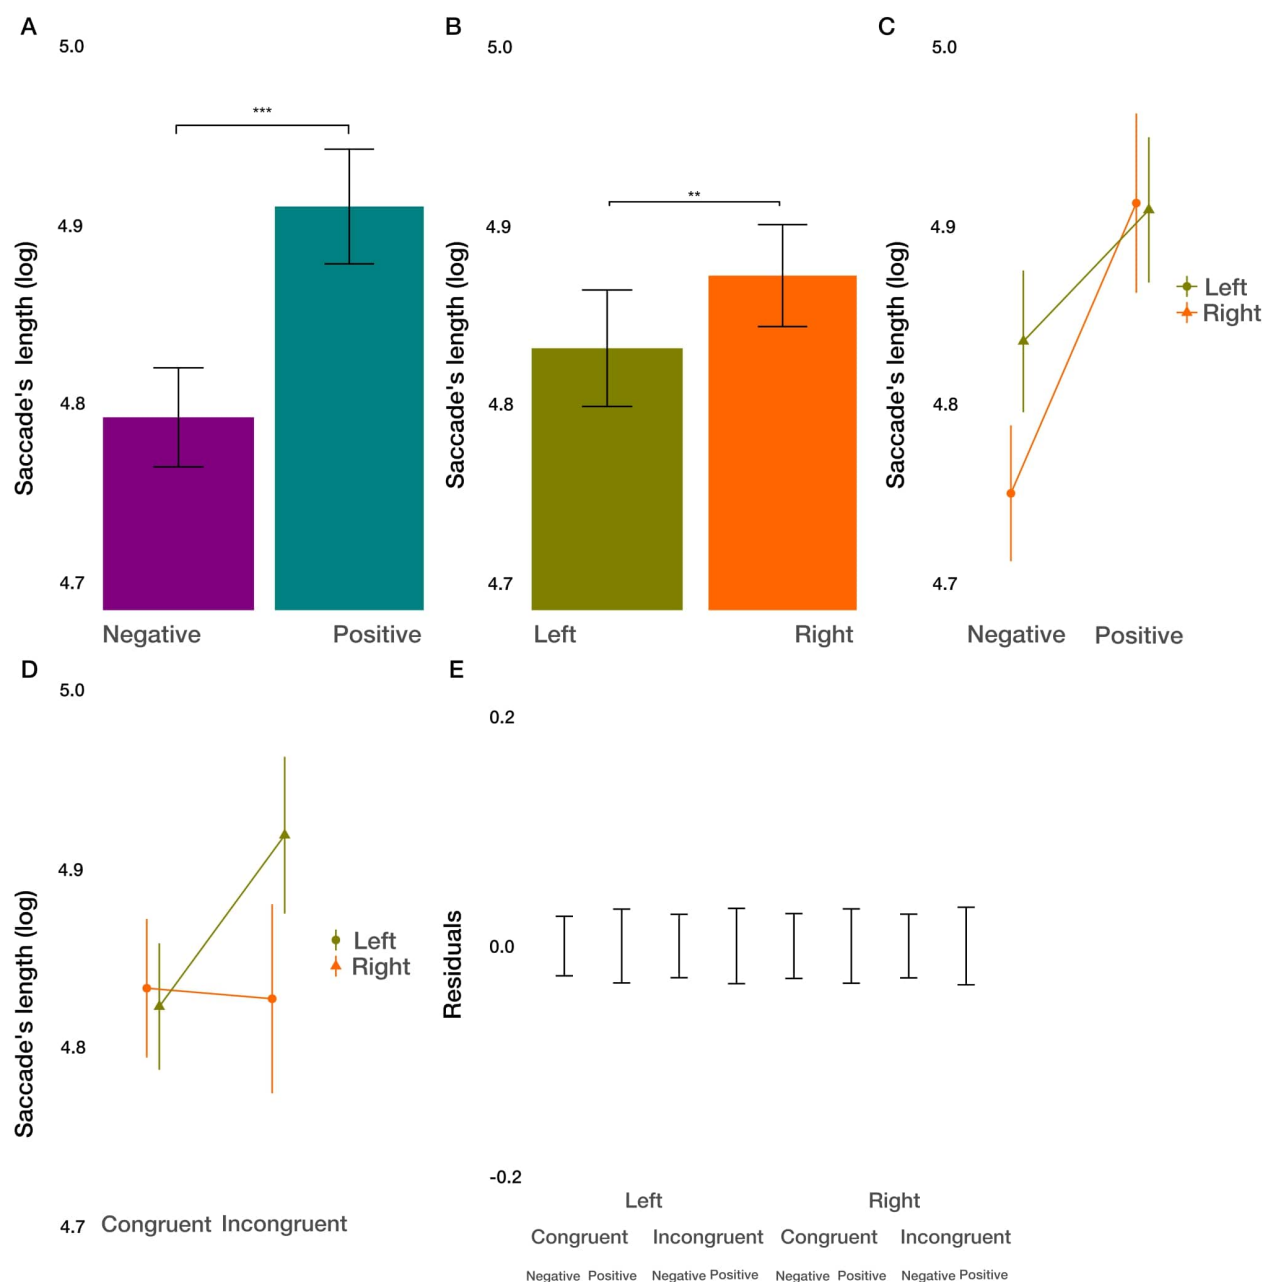

**Fig. 7.** Saccade's length results. (A) The main effect of image valence. (B) The main effect of the side (left vs. right). (C) Interaction between image valence and side of the image. (D) Interaction between congruency of the priming and side of the image. (E) Averaged residuals of all condition combinations from reaction time linear mixed model. In all plots, bars represent mean values and whiskers standard error of the mean.

ative images. The effect of the side of the image and all two-way and three-way interactions were not significant (all  $p > .12$ ). Furthermore, we analyzed the length of saccades from outside images towards them. We found the main effect of congruency of the priming ( $t(2011.69) = 2.189$ ,  $p = .0287$ ). After priming with congruent actions, the average saccade length from outside into the images was shorter by 9.71%. Furthermore, the main effect of the side of the image ( $t(2009.88) = 2.269$ ,  $p = .0234$ ) on the saccade's length from outside images towards them was significant. Saccades targeting the left image were on average shorter by 10.07%. The effect of the image valence and all two-way and three-way interactions were not significant (all  $p > .06$ ). These

results suggest that participants on average make shorter and more saccades after congruent priming from outside images towards them. Furthermore, participants on average make longer saccades from outside images towards the images on the right side.

## Discussion

In the present study, we used an active bodily interaction with affective stimuli in an approach-avoidance task to investigate the influence on the later free visual exploration of news web-pages containing emotional images. First, positively or negatively valenced images were zoomed in or out by the pulling

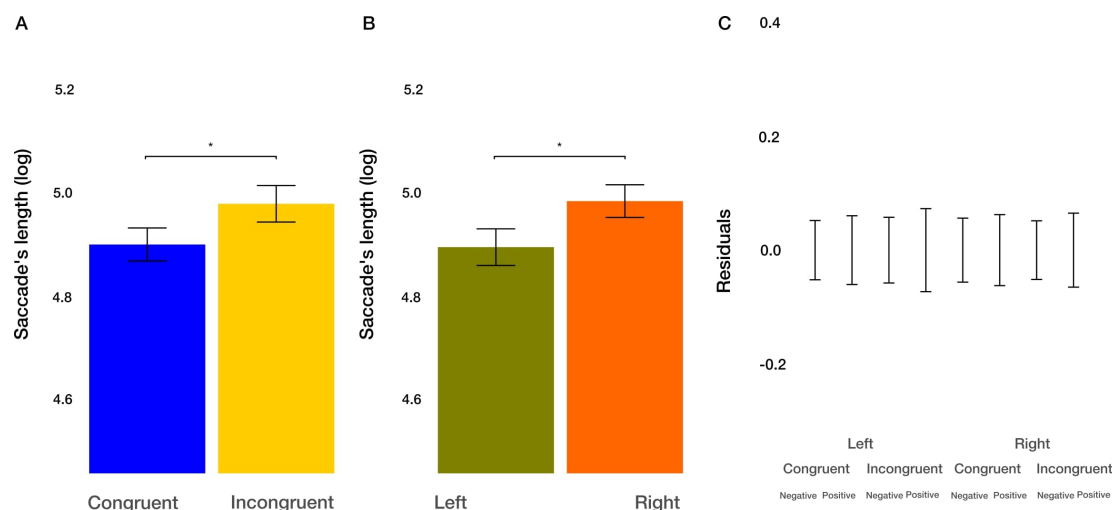

**Fig. 8.** Saccade's length from outside ROIs towards ROIs results. (A) The main effect of the congruency of the priming. (B) The main effect of the side of the image (left vs. right). (C) Averaged residuals of all condition combinations from reaction time linear mixed model. In all plots, bars represent mean values and whiskers standard error of the mean.

or pushing of a joystick. Here we found multiplicative effects of valence and condition. That is, we could replicate the results of previous studies and report a faster reaction in the congruent condition. Furthermore, negative stimuli were reacted to faster. The lack of interaction and the additive effects on the log-reaction time suggest independent multiplicative effects on the base reaction time. Second, concerning the influence of embodied priming on eye movements in the subsequent free-viewing task, we observed main effects of valence, side of presentation, condition, as well as specific interactions. This demonstrates the influence of stimulus properties (valence), internal variables (priming by condition), and spatial properties (side) on visual exploration.

The following discussion will address the two main parts of our analyses. We will first discuss the viewing behavior (fixations and saccades) made only in the emotion-laden main news. The subsequent part deals with the approach and avoidance behavior while performing the approach-avoidance task, while taking the reaction times into account. First, we observed an influence of the priming condition, i.e., performing congruent or incongruent actions in the approach-avoidance task on later visual exploration. Specifically, after priming in the congruent condition, the number of fixations on images increased, the total dwell time increased, and the average saccade length from outside of the images towards the images decreased. The combination of these effects suggests increased attention to the image content of web pages after the subjects performed congruent actions on images in the priming phase. Thus, congruent bodily interaction with images in the priming phase fosters visual interaction in the subsequent exploration phase.

Second, we found systematic effects of the valence of images in the exploration phase. Specifically, on images with negative valence, the average fixation duration was prolonged, more fixations were completed, and the total dwell time increased. Particularly, the average length of saccades within the images of negative valence decreased. This combination

of effects speaks for increased scrutiny of negative valenced images.

Third, we observed a lateral asymmetry in the visual exploration phase. Participants displayed on average longer fixations, more fixations, and longer dwell time on the left side. The change of the length of saccades within the images was significant, but quantitatively not relevant. In contrast, the length of saccades from outside of the images towards the inside was shorter on the left side. The combination of these effects largely resembles the effects observed with respect to the priming condition and suggests increased visual interaction with stimuli presented on the left side. These results further corroborate results suggesting spatial biases in eye movements (40). This suggests that biases towards the left side influence not only the number of fixations but the major properties of visual exploration as well.

Finally, with respect to interactions of condition, valence, and side, it is noteworthy that there were only a few. For the number of fixations, dwell time, and the average length of saccades from outside to inside we did not observe any 2-way or 3-way interactions, and the residuals after discounting for the main effects were rather small. Only for the average saccadic length within the images, did we observe an interaction of valence\*side and condition\*side and for the average fixation duration an interaction of valence\*side. It appears that with respect to the saccadic length within the images for the left side, the valence is more important and the priming condition less important for images on the left side. The fixation duration is less affected by image valence on the left side. Overall, it is striking that the effects of the three independent variables are largely independent and the interactions are limited to a few aspects.

The results of this study suggest that approach and avoidance reactions in humans have a direct influence on attention allocation and gaze behavior. We used the embodied cognition approach and, more specifically, the approach-avoidance task to explore its effect on eye movements. This study adds to the

limited amount of eye-tracking research that has dealt with the interplay of top-down influences and bottom-up features.

To induce a positive or a negative mood, (13) had participants watch either positive or negative sequences of 44 full-colored images from the International Affective Picture System (IAPS; (34)) with a valence rating below 3 for negative and a valence rating above 7 for positive primes. In the subsequent eye-tracking session, they presented 24 similarly structured webpages that included a positive and a negative IAPS image: one on the left, the other on the right. They found that a negative mood state marginally elicited a more spatially extensive exploration. In our study we used the same news web pages. However, instead of inducing mood by passively watching pictures, we used an approach-avoidance task as an embodied prime for positive and negative moods. In contrast, no specific emotional valence was primed, but rather the congruent or incongruent action, i.e. approach/avoidance of positive/negative valenced stimuli or the reverse assignment. There is ample evidence that our emotions or moods affect our visual behavior. In regard to the direct effect of emotions on visual exploration, the broaden-and-build model of positive emotions (41) claims that positive emotions such as joy, interest, elation, or love, temporarily expand the focus of attention therefore increasing the thought-action repertoire by fostering interest in the environment and encouraging play and exploration (42). Accordingly, being in a happy mood versus being in a sad or neutral mood has been shown to increase participants' breadth of attention (43). Similarly, (44) found that the distribution of participants' fixations on an image is broader in individuals induced into a positive mood, with more frequent saccades to neutral or positively valenced parts and with more fixations on positively valenced peripheral stimuli. Whereas, broadened attention is often associated with anxiety (45), which has led some to speculate that this might be an adaption to a negative mood (46), while a positive mood may reduce the motivation to scrutinize the environment because of an increased feeling of safety (47). Part of the explanation for these diverse findings may be that the mood induction procedures are also diverse, in particular with respect to neutral mood states. For instance, whereas some actively induce a positive mood by offering participants a bag of candies but simply do nothing in the neutral condition (44), others rely on a waiting room manipulation to actively induce a neutral mood (48). Other have also been known to use movies (49) or music (50). According to (13), this diversity of mood induction method questions the assumption that a neutral mood state is always an adequate control condition. This may help explain why being in a negative mood had the same effect as being in a neutral mood according to some studies (43). Whereas other studies found similar effects of being in a positive and neutral mood (51). In light of this still unresolved issue, the present study followed (13) and solely contrasted positive with negative moods and focused on the effects of priming in congruent vs. incongruent actions in an approach-avoidance task.

When investigating embodied cognition, a high degree of ecological validity is necessary. We instructed participants

to use a joystick to either approach or avoid positively or negatively valenced pictures displayed on a screen (52). To increase immersion, we implemented a visual 'zooming-effect' (18). When the joystick was pushed, the images were zoomed out, and when it was pulled, the images were zoomed in. This not only ensured a more realistic impression of movement towards or away from the images, but it also illustrated any ambiguity in the participants' arm movements. The appraisal of a movement depends upon what is achieved (53, 54). Stretching out one's arm often indicates a negatively valenced avoidance-behavior, i.e., when a harmful object is pushed away. Yet, it can also be an indispensable part of a positively valenced approach-behavior, for instance when one reaches for nourishing food or one's infant. A joystick-based Approach avoidance task with a zooming-effect resolves this ambivalence. To further increase the immersion utilizing techniques of virtual reality offer themselves.

In addition to the effect of a participant's mood state/participants' mood states on their attention, we also explored the approach and avoidance behavior in the priming conditions. Since the IAPS pictures have exhibited an impact on the emotions of participants and therefore serve as a reliable priming method (13), we made use of them in our study to also modulate congruent vs. incongruent actions by the participants. Previous study designs have solely presented participants with a row of picture within one category. However, our study design differs from previous work in that we let the participants visually and physically interact with the depicted pictures. For this reason, we joined pictures of two valence categories in one task, which had to be treated differently. Since we were working with IAPS images, it worthy to mentioned that the highly negative images were also accompanied by a higher level of arousal, in contrast to highly positive images (34). This applies to the IAPS images within the priming block, as well as the images embedded in the news web pages. As (13) note, negative emotions, such as anxiety, anger, and fear, also happen to be more arousing for the participants compared to positive emotions, such as pride or happiness. This applies to negative and positive mood conditions as well. As mentioned in the introduction, along with the increment of arousal in a negative mood, comes an increase in attention. This is caused by the initiation of survival-related actions that relate to behavioral and physical fight-or-flight responses (42). In turn, the specific arousal, which is immediately elicited by the mere presence of the valenced images, is interwoven with the arousal that is elicited by the interactive treatment of the images in the priming condition. Since the primes used in this study comprised of both valence categories, it is challenging to make any explicit distinction. However, the approach-avoidance task served as an authentic method to strive for and impact the internal approach and avoidance reactions in humans. Participants in the incongruent priming condition were significantly slower in treating the primes as instructed. Thus, they were slower to pull negative images towards themselves and push positive images away from themselves. The difficulty of the incongruent priming condi-

tion task was reflected in the participants' reaction times. In general, the task instruction (to pull negative images towards oneself) essentially acts against the avoidance effect, which has been presented as an example of embodied cognition that emphasizes action-oriented behavior, i.e., actions related to survival. A direct comparison of both task conditions clearly revealed the avoidance effect. In the congruent condition, participants were significantly faster to avoid the negative stimuli, compared with avoiding the positive stimuli in the incongruent condition.

In the case of controlled attentional shifts, older adults show a positivity bias and negativity avoidance (55). In contrast, no such bias is observable for automatic attentional shifts (56–58). The results are inconclusive for younger adults. Some studies find a preference for negative stimuli (3, 59), while others report a tendency to avoid negative stimuli (60). Some studies find mood-incongruent preferences (61, 62), while others report mood-congruent preferences (63–66). Presumably, this inconsistency is in part due to the fact that studies only focused on external affective influences and disregarded the participants' mood state. Considering participants' mood states is crucial, however, because one's mood state can determine one's current goals. In fact, When mood regulation is the primary goal of younger adults, they focus less on negative images and more on positive images (67). Moreover, students who learn to focus on positive stimuli subsequently show reduced attention for negative stimuli (44), indicating that attention is a powerful tool for mood regulation (68). In contrast, (69) found that a positive mood can increase attention for negative information. However, the primary goal of young adults exploring news pages is arguably not mood regulation. They are rather in a 'browsing mode' in which they search for personally interesting information. In such a mode, features of the stimulus, such as its valence, are more likely to catch the observer's attention (70). In contrast to these mixed results, the effects of congruent vs. incongruent conditions in the present study are rather straightforward.

Many studies investigated an automatic approach bias in patients with substance abuse disorders. Individuals with a substance abuse disorder exhibit an automatic bias toward drug-related words (71) (Cox et al., 2006) or pictures (72). In stimulus-response compatibility tasks, in which participants have to use a joystick to move cues either away or towards themselves, they approach rather than avoid drug-related cues and they approach them faster than they avoid them. In an implicit approach-avoidance task, in which participants push and pull cues according to formal features (like the format of a picture (73) or its vertical alignment (74)), heavy drinkers (75), patients with alcohol abuse disorder (73, 76), heroin addicts (77), smokers (78–80), and cannabis users (74) approach drug cues faster than healthy controls. In an explicit approach-avoidance task in which participants either push away drug cues while pulling neutral cues towards them or vice versa, individuals with alcohol abuse disorder approach drug cues faster than they avoid them (81). Thus, there is accumulating evidence for a general automatic approach/avoidance bias related to substance abuse.

In summary, we present how congruent embodied priming influences eye movements in a free-viewing task. Results presented in our study suggest that prior congruent movements, in line with our bodily reactions, can influence how we scrutinize images presented on the World Wide Web.

We found that movements in line with our bodily reactions (approach positive and avoid negative) influence how we observe images presented on the World Wide Web.

## Conflict of Interest Statement

The authors declare that the research was conducted in the absence of any commercial or financial relationships that could be construed as a potential conflict of interest.

## Author Contributions

Conceived the study (PK, SW). Study design (FA, PK), data collection (FA), data analysis (AC, FA, PK). Initial draft of the manuscript (AC). Revisions and finalizing the manuscript (AC, FA, PK).

## Acknowledgments and Funding

We gratefully acknowledge the support by the DFG-funded Research Training Group Situated Cognition (GRK 2185/1), "Niedersächsischen Innovationsförderprogramms für Forschung und Entwicklung in Unternehmen (NBank) - EyeTrax, and the Deutsche Forschungsgemeinschaft (DFG) Open Access Publishing Fund of Osnabrück University. Moreover, we would like to thank Clayton Thompson for feedback on the manuscript.

## Data Availability Statement

The datasets for this study can be found at <https://osf.io/cyz9b/>.

## Bibliography

1. Laurent Itti and Christof Koch. A saliency-based search mechanism for overt and covert shifts of visual attention. *Vision Research*, 40(10-12):1489–1506, June 2000. ISSN 00426989. doi: 10.1016/S0042-6989(99)00163-7.
2. Anne M Treisman and Garry Gelade. A feature-integration theory of attention. *Cognitive psychology*, 12(1):97–136, 1980.
3. Ruthann C. Thomas and Lynn Hasher. The influence of emotional valence on age differences in early processing and memory. *Psychology and Aging*, 21(4):821–825, 2006. ISSN 1939-1498, 0882-7974. doi: 10.1037/0882-7974.21.4.821.
4. W. Einhauser, M. Spain, and P. Perona. Objects predict fixations better than early saliency. *Journal of Vision*, 8(14):18–18, November 2008. ISSN 1534-7362. doi: 10.1167/8.14.18.
5. Wolfgang Einhauser, Ueli Rutishauser, and Christof Koch. Task-demands can immediately reverse the effects of sensory-driven saliency in complex visual stimuli. *Journal of Vision*, 8(2):2, February 2008. ISSN 1534-7362. doi: 10.1167/8.2.2.
6. Mary M. Hayhoe, Anurag Shrivastava, Ryan Mruczek, and Jeff B. Pelz. Visual memory and motor planning in a natural task. *Journal of Vision*, 3(1):6, February 2003. ISSN 1534-7362. doi: 10.1167/3.1.6.
7. Constantin A. Rothkopf, Dana H. Ballard, and Mary M. Hayhoe. Task and context determine where you look. *Journal of Vision*, 7(14):16, July 2016. ISSN 1534-7362. doi: 10.1167/7.14.16.
8. Kai Kaspar, Teresa-Maria Hloucal, Jürgen Kriz, Sonja Canzler, Ricardo Ramos Gameiro, Vanessa Krapp, and Peter König. Emotions' Impact on Viewing Behavior under Natural Conditions. *PLoS ONE*, 8(1):e52737, January 2013. ISSN 1932-6203. doi: 10.1371/journal.pone.0052737.
9. Benjamin W. Tatler. The central fixation bias in scene viewing: Selecting an optimal viewing position independently of motor biases and image feature distributions. *Journal of Vision*, 7(14):4, November 2007. ISSN 1534-7362. doi: 10.1167/7.14.4.



10. Niklas Wilming, Simon Harst, Nico Schmidt, and Peter König. Saccadic Momentum and Facilitation of Return Saccades Contribute to an Optimal Foraging Strategy. *PLoS Computational Biology*, 9(1):e1002871, January 2013. ISSN 1553-7358. doi: 10.1371/journal.pcbi.1002871.
11. Sepp Kollmorgen, Nora Nortmann, Sylvia Schröder, and Peter König. Influence of Low-Level Stimulus Features, Task Dependent Factors, and Spatial Biases on Overt Visual Attention. *PLoS Computational Biology*, 6(5):e1000791, May 2010. ISSN 1553-7358. doi: 10.1371/journal.pcbi.1000791.
12. Kai Kaspar and Peter König. Emotions and personality traits as high-level factors in visual attention: A review. *Frontiers in Human Neuroscience*, 6, 2012. ISSN 1662-5161. doi: 10.3389/fnhum.2012.00321.
13. Kai Kaspar, Ricardo Ramos Gameiro, and Peter König. Feeling good, searching the bad: Positive priming increases attention and memory for negative stimuli on webpages. *Computers in Human Behavior*, 53:332–343, December 2015. ISSN 07475632. doi: 10.1016/j.chb.2015.07.020.
14. Mark Chen and John A. Bargh. Consequences of Automatic Evaluation: Immediate Behavioral Predispositions to Approach or Avoid the Stimulus. *Personality and Social Psychology Bulletin*, 25(2):215–224, February 1999. ISSN 0146-1672, 1552-7433. doi: 10.1177/0146167299025002007.
15. Daniel Casasanto and Katinka Dijkstra. Motor action and emotional memory. *Cognition*, 115(1):179–185, April 2010. ISSN 00100277. doi: 10.1016/j.cognition.2009.11.002.
16. R. Hans Phaf, SÅfren E. Mohr, Mark Rotteveel, and Jelte M. Wicherts. Approach, avoidance, and affect: A meta-analysis of approach-avoidance tendencies in manual reaction time tasks. *Frontiers in Psychology*, 5, May 2014. ISSN 1664-1078. doi: 10.3389/fpsyg.2014.00378.
17. Jason M. Sharbanee, Litje Hu, Werner G. K. Stritzke, Reinout W. Wiers, Mike Rinck, and Colin MacLeod. The Effect of Approach/Avoidance Training on Alcohol Consumption Is Mediated by Change in Alcohol Action Tendency. *PLoS ONE*, 9(1):e85855, January 2014. ISSN 1932-6203. doi: 10.1371/journal.pone.0085855.
18. Mike Rinck and Eni S. Becker. Approach and avoidance in fear of spiders. *Journal of Behavior Therapy and Experimental Psychiatry*, 38(2):105–120, June 2007. ISSN 00057916. doi: 10.1016/j.jbtep.2006.10.001.
19. Kathrin Heuer, Mike Rinck, and Eni S. Becker. Avoidance of emotional facial expressions in social anxiety: The Approach–Avoidance Task. *Behaviour Research and Therapy*, 45(12): 2990–3001, December 2007. ISSN 00057967. doi: 10.1016/j.brat.2007.08.010.
20. Elliot C. Brown, Cumhur Tas, Duygu Kuzu, Aysen Esen-Danaci, Karin Roelofs, and Martin Brüne. Social approach and avoidance behaviour for negative emotions is modulated by endogenous oxytocin and paranoia in schizophrenia. *Psychiatry Research*, 219(3):436–442, November 2014. ISSN 01651781. doi: 10.1016/j.psychres.2014.06.038.
21. Esther M. Veenstra and Peter J. de Jong. Reduced automatic motivational orientation towards food in restricting anorexia nervosa. *Journal of Abnormal Psychology*, 120(3):708–718, 2011. ISSN 1939-1846, 0021-843X. doi: 10.1037/a0023926.
22. Lawrence Shapiro. *Embodied Cognition*. Routledge, 2011.
23. Andreas K. Engel, Alexander Maye, Martin Kurthen, and Peter König. Where's the action? The pragmatic turn in cognitive science. *Trends in Cognitive Sciences*, 17(5):202–209, May 2013. ISSN 13646613. doi: 10.1016/j.tics.2013.03.006.
24. Sven Walter. Situated Cognition: A Field Guide to Some Open Conceptual and Ontological Issues. *Review of Philosophy and Psychology*, 5(2):241–263, June 2014. ISSN 1878-5158, 1878-5166. doi: 10.1007/s13164-013-0167-y.
25. Arthur M. Glenberg and Michael P. Kaschak. Grounding language in action. *Psychonomic bulletin & review*, 9(3):558–565, 2002.
26. Mukul Bhalla and Dennis R. Proffitt. Visual–motor recalibration in geographical slant perception. *Journal of experimental psychology: Human perception and performance*, 25(4): 1076, 1999.
27. Jessica K. Witt and Dennis R. Proffitt. Action-specific influences on distance perception: A role for motor simulation. *Journal of Experimental Psychology: Human Perception and Performance*, 34(6):1479–1492, 2008. ISSN 1939-1277, 0096-1523. doi: 10.1037/a0010781.
28. Lawrence W. Barsalou. Grounded Cognition. *Annual Review of Psychology*, 59(1):617–645, January 2008. ISSN 0066-4308, 1545-2085. doi: 10.1146/annurev.psych.59.103006.093639.
29. Ellen Fridland and Corinde E. Wiers. Addiction and embodiment. *Phenomenology and the Cognitive Sciences*, 17(1):15–42, February 2018. ISSN 1568-7759, 1572-8676. doi: 10.1007/s11097-017-9508-0.
30. Mary Ellen Stoykov, Daniel Montie Corcos, and Sangeetha Madhavan. Movement-Based Priming: Clinical Applications and Neural Mechanisms. *Journal of Motor Behavior*, 49(1): 88–97, January 2017. ISSN 0022-2895, 1940-1027. doi: 10.1080/00222895.2016.1250716.
31. Paula M. Niedenthal, Lawrence W. Barsalou, Piotr Winkielman, Silvia Krauth-Gruber, and François Ric. Embodiment in Attitudes, Social Perception, and Emotion. *Personality and Social Psychology Review*, 9(3):184–211, August 2005. ISSN 1088-8683, 1532-7957. doi: 10.1207/s15327957pspr0903\_1.
32. Achim Stephan, Sven Walter, and Wendy Wilutzky. Emotions beyond brain and body. *Philosophical Psychology*, 27(1):65–81, January 2014. ISSN 0951-5089, 1465-394X. doi: 10.1080/09515089.2013.828376.
33. Antonio Damasio. Fundamental feelings. *Nature*, 413(6858):781–781, 2001.
34. Peter J. Lang, Margaret M. Bradley, Bruce N. Cuthbert, et al. International affective picture system (IAPS): Technical manual and affective ratings. *NIMH Center for the Study of Emotion and Attention*, 1:39–58, 1997.
35. L. Itti, C. Koch, and E. Niebur. A model of saliency-based visual attention for rapid scene analysis. *IEEE Transactions on Pattern Analysis and Machine Intelligence*, 20(11):1254–1259, 1998. ISSN 01628828. doi: 10.1109/34.730558.
36. Jonathan Harel, Christof Koch, and Pietro Perona. Graph-based visual saliency. In *Advances in Neural Information Processing Systems*, pages 545–552, 2007.
37. Douglas Bates, Martin Mächler, Ben Bolker, and Steve Walker. Fitting Linear Mixed-Effects Models using lme4. *arXiv:1406.5823 [stat]*, June 2014.
38. Alexandra Kuznetsova, Per B. Brockhoff, and Rune H. B. Christensen. lmerTest package: Tests in linear mixed effects models. *Journal of Statistical Software*, 82(13):1–26, 2017. doi: 10.18637/jss.v082.i13.
39. Benedikt V. Ehinger, Lilli Kaufhold, and Peter König. Probing the temporal dynamics of the exploration–exploitation dilemma of eye movements. *Journal of Vision*, 18(3):6, March 2018. ISSN 1534-7362. doi: 10.1167/18.3.6.
40. J. P. Ossandon, S. Onat, and P. König. Spatial biases in viewing behavior. *Journal of Vision*, 14(2):20–20, February 2014. ISSN 1534-7362. doi: 10.1167/14.2.20.
41. Barbara L. Fredrickson. What Good Are Positive Emotions? *Review of General Psychology*, 2(3):300–319, September 1998. ISSN 1089-2680, 1939-1552. doi: 10.1037/1089-2680.2.3.300.
42. Barbara L. Fredrickson. Cultivating positive emotions to optimize health and well-being. *Prevention & treatment*, 3(1):1a, 2000.
43. G. Rowe, J. B. Hirsh, and A. K. Anderson. Positive affect increases the breadth of attentional selection. *Proceedings of the National Academy of Sciences*, 104(1):383–388, January 2007. ISSN 0027-8424, 1091-6490. doi: 10.1073/pnas.0605198104.
44. Heather A. Wadlinger and Derek M. Isaacowitz. Positive mood broadens visual attention to positive stimuli. *Motivation and Emotion*, 30(1):87–99, March 2006. ISSN 0146-7239, 1573-6644. doi: 10.1007/s11031-006-9021-1.
45. John Gruzelier and Michael Phelan. Stress induced reversal of a lexical divided visual-field asymmetry accompanied by retarded electrodermal habituation. *International Journal of Psychophysiology*, 11(3):269–276, December 1991. ISSN 01678760. doi: 10.1016/0167-8760(91)90021-O.
46. Eric L. Garland, Susan A. Gaylord, and Barbara L. Fredrickson. Positive Reappraisal Mediates the Stress-Reductive Effects of Mindfulness: An Upward Spiral Process. *Mindfulness*, 2(1):59–67, March 2011. ISSN 1868-8527, 1868-8535. doi: 10.1007/s12671-011-0043-8.
47. Norbert Schwarz. *Feelings as Information: Informational and Motivational Functions of Affective States*. The Guilford Press, 1990.
48. Rachel S. Herz, Corrente Schankler, and Sophia Beland. Olfaction, Emotion and Associative Learning: Effects on Motivated Behavior. *Motivation and Emotion*, 28(4):363–383, December 2004. ISSN 0146-7239, 1573-6644. doi: 10.1007/s11031-004-2389-x.
49. Anna Grubert, Petra Schmid, and Joseph Krummenacher. Happy with a difference, unhappy with an identity: Observers' mood determines processing depth in visual search. *Attention, Perception, & Psychophysics*, 75(1):41–52, January 2013. ISSN 1943-3921, 1943-393X. doi: 10.3758/s13414-012-0385-x.
50. Kimron L. Shapiro and Anne Lim. The impact of anxiety on visual attention to central and peripheral events. *Behaviour Research and Therapy*, 27(4):345–351, 1989. ISSN 00057967. doi: 10.1016/0005-7967(89)90004-1.
51. Susan Y. Chipchase and Peter Chapman. Trade-offs in visual attention and the enhancement of memory specificity for positive and negative emotional stimuli. *Quarterly Journal of Experimental Psychology*, 66(2):277–298, February 2013. ISSN 1747-0218, 1747-0226. doi: 10.1080/17470218.2012.707664.
52. Lena H. Ernst, Michael M. Plichta, Elisabeth Lutz, Anna K. Zesewitz, Sara V. Tupak, Thomas Dresler, Ann-Christine Ehls, and Andreas J. Fallgatter. Prefrontal activation patterns of automatic and regulated approach–avoidance reactions – A functional near-infrared spectroscopy (fNIRS) study. *Cortex*, 49(1):131–142, January 2013. ISSN 00109452. doi: 10.1016/j.cortex.2011.09.013.
53. Tristan Lavender and Bernhard Hommel. Affect and action: Towards an event-coding account. *Cognition & Emotion*, 21(6):1270–1296, September 2007. ISSN 0269-9931, 1464-0600. doi: 10.1080/02699930701438152.
54. Regina Krieglmeier, Roland Deutsch, Jan De Houwer, and Rudi De Raedt. Being Moved: Valence Activates Approach-Avoidance Behavior Independently of Evaluation and Approach-Avoidance Intentions. *Psychological Science*, 21(4):607–613, April 2010. ISSN 0956-7976, 1467-9280. doi: 10.1177/0956797610365131.
55. Derek M. Isaacowitz, Heather A. Wadlinger, Deborah Goren, and Hugh R. Wilson. Is there an age-related positivity effect in visual attention? A comparison of two methodologies. *Emotion*, 6(3):511–516, 2006. ISSN 1931-1516, 1528-3542. doi: 10.1037/1528-3542.6.3.511.
56. Sowon Hahn, Curt Carlson, Shawn Singer, and Scott D. Gronlund. Aging and visual search: Automatic and controlled attentional bias to threat faces. *Acta Psychologica*, 123(3):312–336, November 2006. ISSN 00016918. doi: 10.1016/j.actpsy.2006.01.008.
57. M. Mather and M. R. Knight. Angry Faces Get Noticed Quickly: Threat Detection is not Impaired Among Older Adults. *The Journals of Gerontology Series B: Psychological Sciences and Social Sciences*, 61(1):P54–P57, January 2006. ISSN 1079-5014, 1758-5368. doi: 10.1093/geronb/61.1.P54.
58. Marisa Knight, Travis L. Seymour, Joshua T. Gaunt, Christopher Baker, Kathryn Ne-smith, and Mara Mather. Aging and goal-directed emotional attention: Distraction reverses emotional biases. *Emotion*, 7(4):705–714, 2007. ISSN 1931-1516, 1528-3542. doi: 10.1037/1528-3542.7.4.705.
59. J. C. Tomaszczyk, M. A. Fernandes, and C. M. Macleod. Personal relevance modulates the positivity bias in recall of emotional pictures in older adults. *Psychonomic Bulletin & Review*, 15(1):191–196, February 2008. ISSN 1069-9384, 1531-5320. doi: 10.3758/PBR.15.1.191.
60. Mark W. Becker and Brian Detweiler-Bedell. Short article: Early detection and avoidance of threatening faces during passive viewing. *Quarterly Journal of Experimental Psychology*, 62(7):1257–1264, July 2009. ISSN 1747-0218, 1747-0226. doi: 10.1080/17470210902725753.
61. W. Gerrod Parrott and John Sabini. Mood and memory under natural conditions: Evidence for mood incongruent recall. *Journal of Personality and Social Psychology*, 59(2):321, 1990.
62. Susanne Schwager and Klaus Rothermund. Counter-regulation triggered by emotions: Positive/negative affective states elicit opposite valence biases in affective processing. *Cognition & Emotion*, 27(5):839–855, August 2013. ISSN 0269-9931, 1464-0600. doi: 10.1080/02699931.2012.750599.
63. F. Richard Ferraro, Brent King, Beth Ronning, Krista Pekarski, and Jessica Risan. Effects of Induced Emotional State on Lexical Processing in Younger and Older Adults. *The Journal of Psychology*, 137(3):262–272, May 2003. ISSN 0022-3980, 1940-1019. doi: 10.1080/00223980309600613.
64. Derek M. Isaacowitz, Kaitlin Toner, Deborah Goren, and Hugh R. Wilson. Looking While Unhappy: Mood-Congruent Gaze in Young Adults, Positive Gaze in Older Adults. *Psychological Science*, 19(9):848–853, September 2008. ISSN 0956-7976, 1467-9280. doi: 10.1111/j.1467-9280.2008.02167.x.



65. Ernst H.W. Koster, Rudi De Raedt, Lemke Leyman, and Evi De Lissnyder. Mood-congruent attention and memory bias in dysphoria: Exploring the coherence among information-processing biases. *Behaviour Research and Therapy*, 48(3):219–225, March 2010. ISSN 00057967. doi: 10.1016/j.brat.2009.11.004.
66. Mark W. Becker and Mallorie Leinenger. Attentional selection is biased toward mood-congruent stimuli. *Emotion*, 11(5):1248–1254, 2011. ISSN 1931-1516, 1528-3542. doi: 10.1037/a0023524.
67. Cai Xing and Derek M. Isaacowitz. Aiming at Happiness: How Motivation Affects Attention to and Memory for Emotional Images. *Motivation and Emotion*, 30(3):243–250, November 2006. ISSN 0146-7239, 1573-6644. doi: 10.1007/s11031-006-9032-y.
68. Heather A. Wadlinger and Derek M. Isaacowitz. Fixing Our Focus: Training Attention to Regulate Emotion. *Personality and Social Psychology Review*, 15(1):75–102, February 2011. ISSN 1088-8683, 1532-7957. doi: 10.1177/1088868310365565.
69. Enny Das and Bob M. Fennis. In the mood to face the facts: When a positive mood promotes systematic processing of self-threatening information. *Motivation and Emotion*, 32(3):221–230, September 2008. ISSN 0146-7239, 1573-6644. doi: 10.1007/s11031-008-9093-1.
70. K.-C. Hamborg, M. Bruns, F. Ollermann, and K. Kaspar. The effect of banner animation on fixation behavior and recall performance in search tasks. *Computers in Human Behavior*, 28(2):576–582, March 2012. ISSN 07475632. doi: 10.1016/j.chb.2011.11.003.
71. W. Miles Cox, Javad Salehi Fadardi, and Emmanuel M. Pothos. The Addiction-Stroop test: Theoretical considerations and procedural recommendations. *Psychological Bulletin*, 132(3):443–476, 2006. ISSN 1939-1455, 0033-2909. doi: 10.1037/0033-2909.132.3.443.
72. Matt Field, Karin Mogg, Baljit Mann, Gerald A. Bennett, and Brendan P. Bradley. Attentional biases in abstinent alcoholics and their association with craving. *Psychology of Addictive Behaviors*, 27(1):71–80, 2013. ISSN 1939-1501, 0893-164X. doi: 10.1037/a0029626.
73. Reinout W. Wiers, Carolin Eberl, Mike Rinck, Eni S. Becker, and Johannes Lindenmeyer. Retraining Automatic Action Tendencies Changes Alcoholic Patients' Approach Bias for Alcohol and Improves Treatment Outcome. *Psychological Science*, 22(4):490–497, April 2011. ISSN 0956-7976, 1467-9280. doi: 10.1177/0956797611400615.
74. Janna Cousijn, Anna E. Goudriaan, and Reinout W. Wiers. Reaching out towards cannabis: Approach-bias in heavy cannabis users predicts changes in cannabis use: Approach-bias and cannabis use. *Addiction*, 106(9):1667–1674, September 2011. ISSN 09652140. doi: 10.1111/j.1360-0443.2011.03475.x.
75. R. W. Wiers, M. Rinck, M. Dictus, and E. van den Wildenberg. Relatively strong automatic appetitive action-tendencies in male carriers of the OPRM1 G-allele. *Genes, Brain and Behavior*, 8(1):101–106, February 2009. ISSN 16011848, 1601183X. doi: 10.1111/j.1601-183X.2008.00454.x.
76. Corinde E Wiers, Christine Stelzel, Soyoung Q Park, Christiane K Gawron, Vera U Ludwig, Stefan Gutwinski, Andreas Heinz, Johannes Lindenmeyer, Reinout W Wiers, Henrik Walter, and Felix Bermpohl. Neural Correlates of Alcohol-Approach Bias in Alcohol Addiction: The Spirit is Willing but the Flesh is Weak for Spirits. *Neuropsychopharmacology*, 39(3):688–697, February 2014. ISSN 0893-133X, 1740-634X. doi: 10.1038/npp.2013.252.
77. Yanyan Zhou, Xinyu Li, Meng Zhang, Feng Zhang, Chen Zhu, and Mowei Shen. Behavioural approach tendencies to heroin-related stimuli in abstinent heroin abusers. *Psychopharmacology*, 221(1):171–176, May 2012. ISSN 0033-3158, 1432-2072. doi: 10.1007/s00213-011-2557-0.
78. Corinde E. Wiers, Simone Kühn, Amir Homayoun Javadi, Ozlem Korucuoglu, Reinout W. Wiers, Henrik Walter, Jürgen Gallinat, and Felix Bermpohl. Automatic approach bias towards smoking cues is present in smokers but not in ex-smokers. *Psychopharmacology*, 229(1):187–197, September 2013. ISSN 0033-3158, 1432-2072. doi: 10.1007/s00213-013-3098-5.
79. Reinout W. Wiers, Thomas E. Gladwin, Wilhelm Hofmann, Elske Salemink, and K. Richard Ridderinkhof. Cognitive Bias Modification and Cognitive Control Training in Addiction and Related Psychopathology: Mechanisms, Clinical Perspectives, and Ways Forward. *Clinical Psychological Science*, 1(2):192–212, April 2013. ISSN 2167-7026, 2167-7034. doi: 10.1177/2167702612466547.
80. Reinout W. Wiers, Thomas E. Gladwin, and Mike Rinck. Should We Train Alcohol-Dependent Patients to Avoid Alcohol? *Frontiers in Psychiatry*, 4, 2013. ISSN 1664-0640. doi: 10.3389/fpsy.2013.00033.
81. Lena H. Ernst, Michael M. Plichta, Thomas Dresler, Anna K. Zesewitz, Sara V. Tupak, Florian B. Haeussinger, Matthias Fischer, Thomas Polak, Andreas J. Fallgatter, and Ann-Christine Ehli. Prefrontal correlates of approach preferences for alcohol stimuli in alcohol dependence: Approach bias for alcohol. *Addiction Biology*, 19(3):497–508, May 2014. ISSN 13556215. doi: 10.1111/adb.12005.
